# Supplementary material for: Enhanced electrochemical properties of cellular CoPS@C nanocomposites for HER, OER and Li-ion batteries
Source: Royal Society of Chemistry journal article supplement (doi:10.1039/c9ra00869a), 2019-01-01
Supplement: c9ra00869a1.pdf [file c9ra00869a1.pdf]

## Enhanced electrochemical properties of cellular CoPS@C nanocomposite for HER, OER and Li-ion battery

Miao Wang and Kaibin Tang

Corresponding author: Hefei National Laboratory for Physical Sciences at the Microscale, University of Science and Technology of China, Hefei, 230026, China

Department of Chemistry, University of Science and Technology of China, Hefei, 230026, China

E-mail address: kbtang@ustc.edu.cn (K. B. Tang).

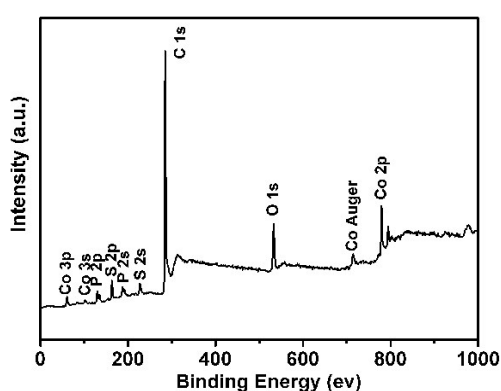

**Fig. S1** XPS survey spectrum of CoPS@C nanocomposite.

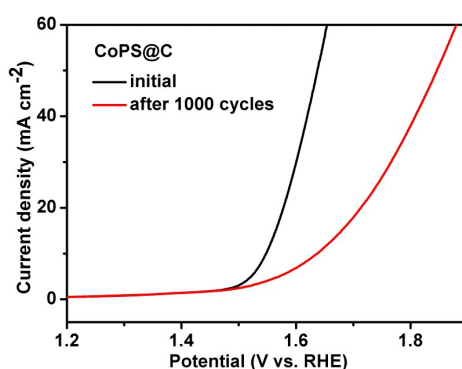

**Fig. S2** OER stability test of the CoPS@C electrode with an initial polarization curve and after 1000 cycles in 1.0 M KOH solution.

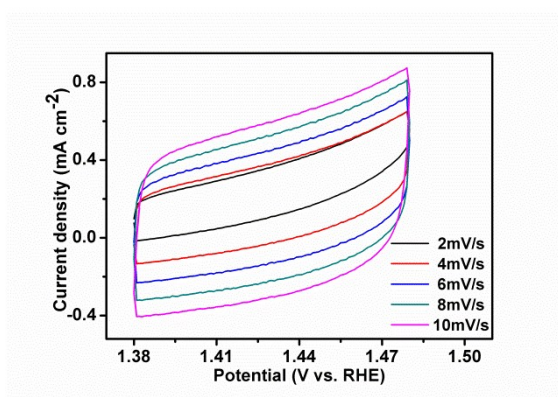

**Fig. S3** Cyclic voltammograms of bulk CoPS at different scan rates.

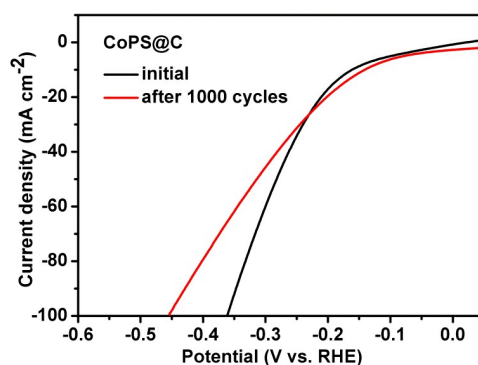

**Fig. S4** HER stability test of the CoPS@C electrode with an initial polarization curve and after 1000 cycles in 0.5 M H<sub>2</sub>SO<sub>4</sub> solution.

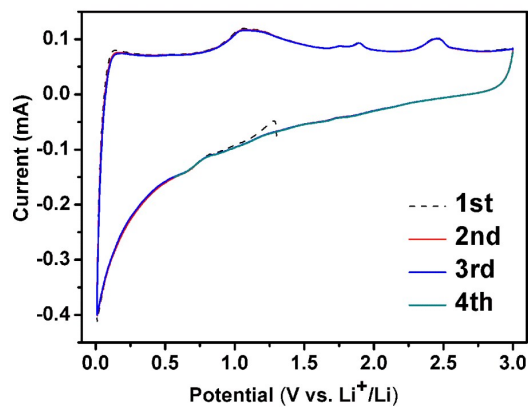

**Fig. S5** The four voltammograms of CoPS@C nanocomposite electrode after 50 cycles at 0.2 A g<sup>-1</sup> between 0.01 V and 3 V.

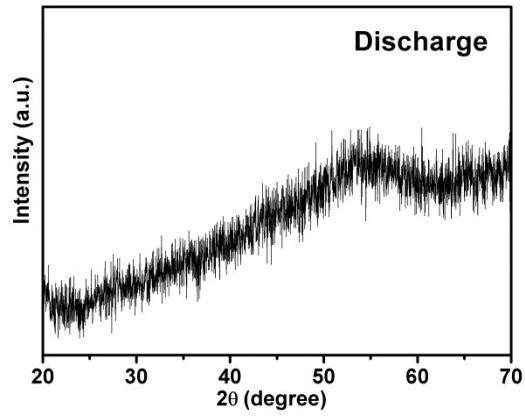

**Fig. S6** Cycle testing of an ex situ XRD pattern of the CoPS@C nanocomposite electrode.
